# Supplementary material for: Irisin Inhibits Atherosclerosis by Promoting Endothelial Proliferation Through microRNA126‐5p
Source: PubMed Central journal article supplement — J Am Heart Assoc. 2016 Sep 26;5(9):e004031. doi: 10.1161/JAHA.116.004031 (PMC5079047; doi:10.1161/jaha.116.004031), 2016-09-26
Supplement: JAH3-5-e004031-s001.pdf [file JAH3-5-e004031-s001.pdf]

# **SUPPLEMENTAL MATERIAL**

Figure S1.

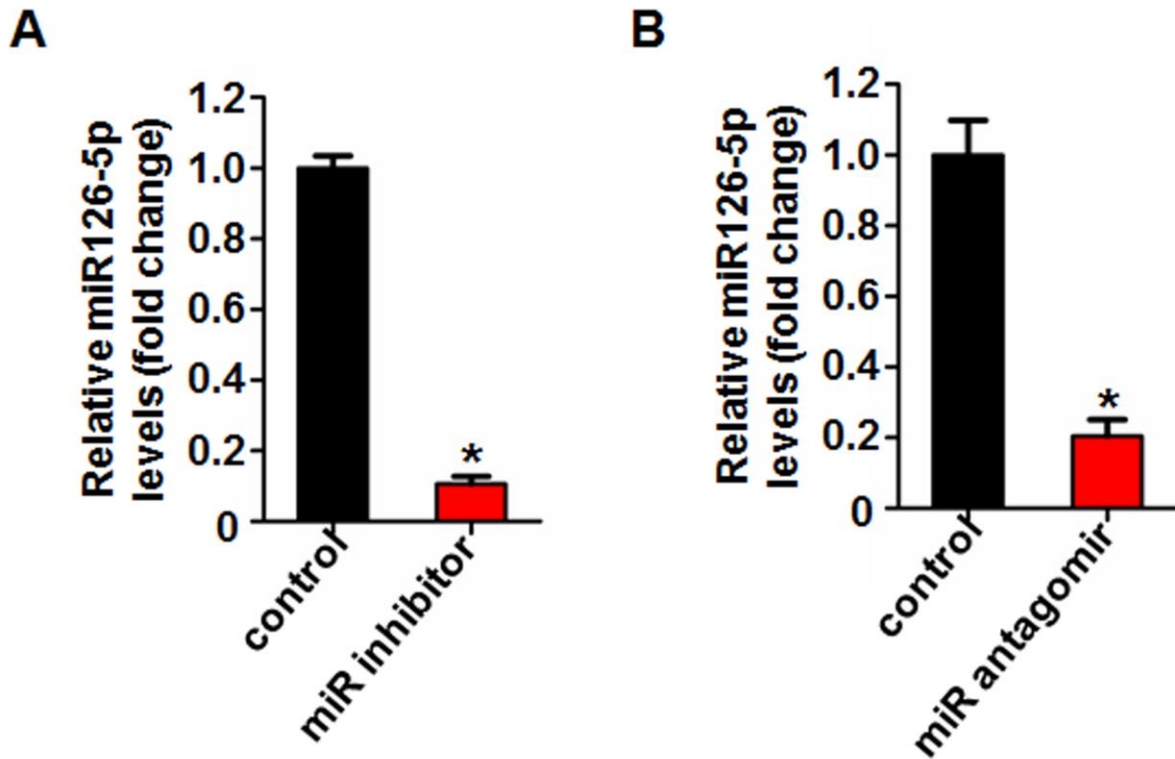

**Figure S1. miR126-5p levels after transfection of the miR126-5p inhibitor in vitro and the miR126-5p antagomir in vivo.** (A) HUVECs were transfected as indicated. At 24 h post transfection, cellular RNAs were isolated for detection of miR126-5p using qRT-PCR. (B) The miR126-5p antagomir was applied to the partial ligated carotid artery for 4 weeks, and RNAs were isolated for detection of miR126-5p using qRT-PCR. The data were normalized to that of negative control samples. The data were expressed as the mean  $\pm$  SEM of three independent experiments. \*P < 0.05 vs. control.

Figure S2.

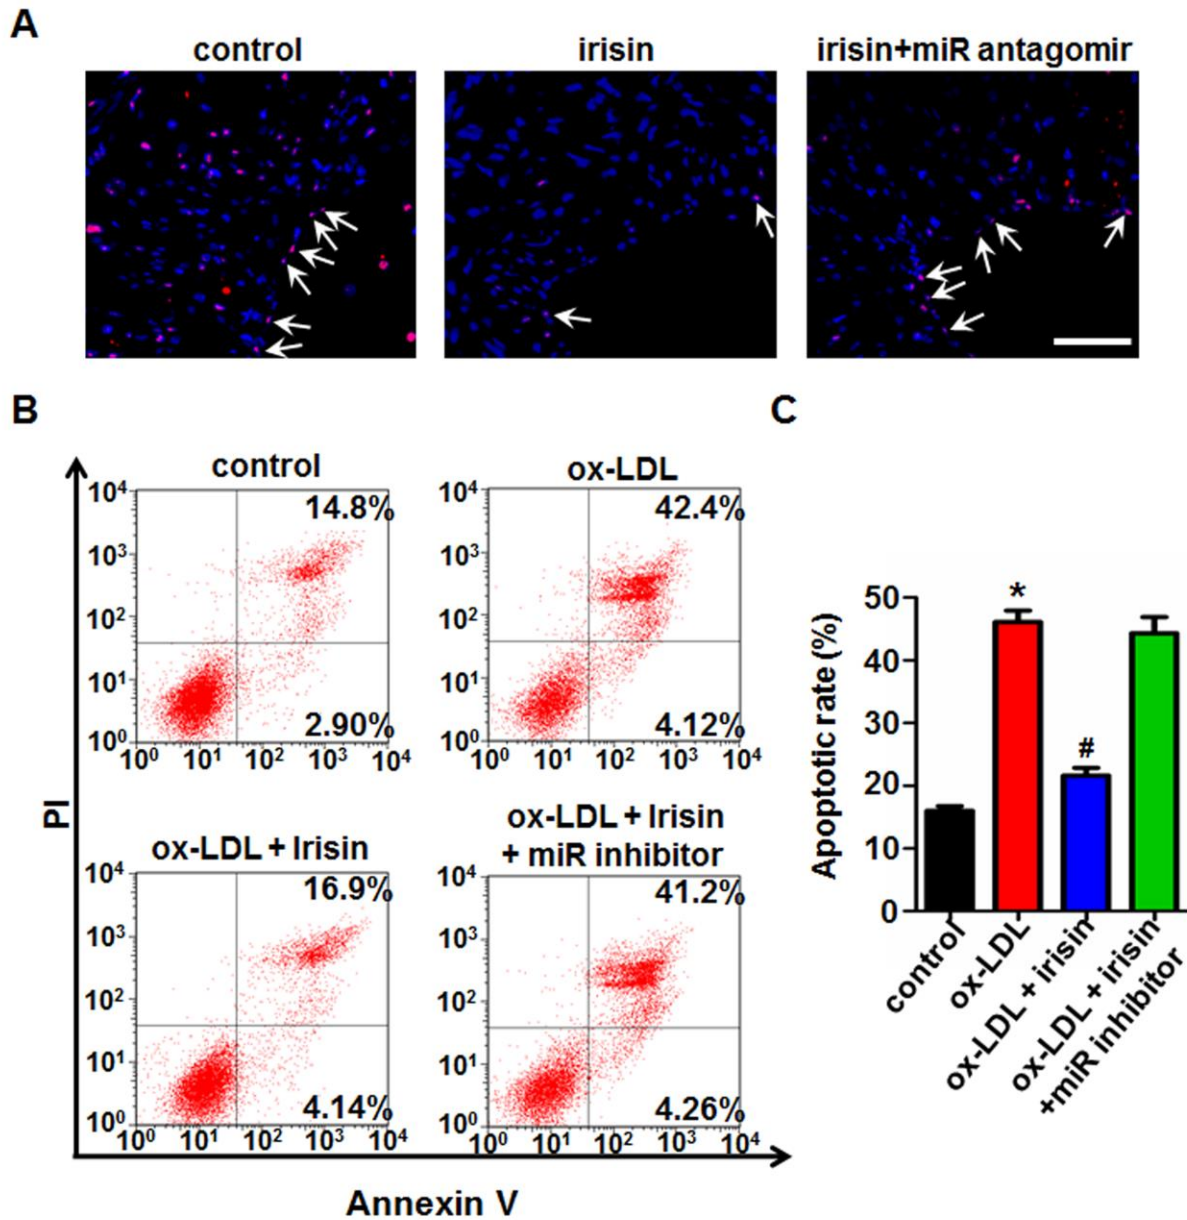

**Figure S2. miR126-5p mediated the inhibitory effect of irisin on ox-LDL induced EC apoptosis.** (A) Sections from the mice carotid arteries were labeled by TUNEL to detect apoptotic cells and counterstained with DAPI to detect nuclei. Scale bar

indicates 50  $\mu\text{m}$ . (B) HUVECs were transfected with the miR126-5p inhibitor or negative control for 6h followed by irisin and/or ox-LDL treatment. Apoptosis of HUVECs was detected by using flow cytometry. (C) The apoptotic rate was determined by calculating the ratio of Annexin-V-positive and Annexin-V/PI-double positive cells to total cells. The data were expressed as the mean  $\pm$  SEM of three independent experiments. \*P < 0.05 vs. control, # P < 0.05 vs. ox-LDL - treated group.
